# Supplementary material for: Training scholars in dissemination and implementation research for cancer prevention and control: a mentored approach
Source: Springer Nature journal article supplement (doi:10.1186/s13012-018-0711-3), 2018-01-22
Supplement: MOESM1 [file 15406556]

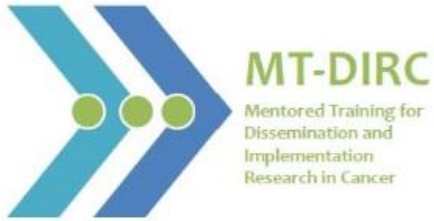

## Sample MT-DIRC Agenda

### Day 1

7:30am-8:30am

**Faculty Only: Mentor Breakfast**  
Presenter: Mentoring Consultant

8:45am-10:00am

**Welcome/Introductions**  
Presenter: PI & Program Coordinator

10:00am-10:15am

Break

10:15am-11:00am

**Evidence-Informed Mentoring: How to be a good mentee**  
Presenter: Mentoring Consultant

11:00am-12:00pm

**BREAKOUTS**  
**1<sup>st</sup> Year Fellows: Initial Meeting with Mentors**  
Mentors & 1<sup>st</sup> year Fellows  
**2<sup>nd</sup> Year Fellows: How to be an Evidence-Informed D&I Mentor**  
Mentoring Consultant & 2<sup>nd</sup> year Fellows

12:00pm-1:00pm

**Lunch Consultations**

1:00pm-1:45pm

**How to Choose your Methods, Frameworks, Models**  
Presenter: Guest Faculty

1:45pm-2:00pm

Break

2:00pm-3:30pm

**BREAKOUTS**  
**1<sup>st</sup> Year Fellows: Present Concept Paper**  
**2<sup>nd</sup> Year Fellows: Works in Progress**

3:30pm-4:30pm

**D&I resource of the Day**  
Presenter: Core Faculty

## Day 2

9:00am-9:15am

### Plan for the Day

Presenter: PI/Program Coordinator

9:15am-9:45am

### Building Partnerships and Sustainability for D&I Research

Presenter: Core Faculty

9:45am-10:35am

### Stakeholder Engagement & Disparities Research Panel

Presenter: Core & Guest Faculty

10:35am-10:50am

Break

10:50am-12:00pm

### BREAKOUTS

1<sup>st</sup> Year Fellows: Refining study aims

2<sup>nd</sup> Year Fellows: Works in Progress

12:00pm-1:00pm

### Lunch Consultations

1:00pm-1:50pm

### Disseminating Digital Health Innovations

Presenter: Guest Faculty

1:50pm-2:00pm

Break

2:00pm-3:00pm

### BREAKOUTS

1<sup>st</sup> Year Fellows: Refining study aims

2<sup>nd</sup> Year Fellows: Works in Progress

3:00pm-3:15pm

Break

3:15pm-4:15pm

### System Science and D&I research

Presenter: Guest Faculty

4:15pm-4:45pm

### D&I Resource of the Day: Online Trainings & Toolkits

Presenter: Core Faculty

## Day 3

9:00am-9:15am

### Plan for the Day

Presenters: PI/ Program Coordinator

9:15am-10:00am

### Navigating the Politics of Innovation Implementation

Presenter: Guest Faculty

10:00am-10:15am

Break

10:15am-11:00am

### Strategies & Measures for D&I research

Presenters: Core Faculty

11:00am-12:15pm

### **BREAKOUTS**

**1<sup>st</sup> Year Fellows: Refining your study design and analytic approaches**

**2<sup>nd</sup> Year Fellows: Peer Product Review**

12:15-1:15pm

### Lunch Consultations

1:15pm-2:15pm

### D&I Grant Writing/Review Panel

Presenters: Core Faculty

2:15pm-2:30pm

Break

2:30pm-3:45pm

### **BREAKOUTS**

**1<sup>st</sup> Year Fellows: Refining your study design & analytic approaches**

**2<sup>nd</sup> Year Fellows: Peer Product Review**

3:45pm-4:30pm

### Mid-Week Mentor Groups Check-in

All Core Faculty & Fellows

## Day 4

9:00am-9:15am

**Plan for the Day**  
Presenters: PI/ Program Coordinator

9:15am-10:00am

**Budget Development and the Business side of D&I research**  
Presenter: Core Faculty

10:00am-10:15am

Break

10:15am-12:00pm

**BREAKOUTS**  
**1<sup>st</sup> Year Fellows: Fish Bowl: Presenting revised research plan**  
**2<sup>nd</sup> Year Fellows: Provide peer feedback for 1<sup>st</sup> Year Fellows**

12:00pm-1:00pm

**Lunch Consultations**

1:00pm-1:45pm

**Shared Decision Making in D&I research**  
Presenter: Guest Faculty

1:45pm-2:00pm

Break

2:00pm-2:45pm

**Reporting Contextual Factors/External Validity**  
Presenter: Core Faculty

2:45pm-4:00pm

**BREAKOUTS**  
**1<sup>st</sup> Year Fellows: Fish Bowl: Presenting revised research plan**  
**2<sup>nd</sup> Year Fellows: Provide peer feedback for 1<sup>st</sup> Year Fellows**

4:00pm-5:00pm

**Getting your D&I paper published: Panel of Journal Editors and Authors**  
Presenter: Core Faculty

## Day 5

8:45am-9:00am

**Plan for the Day**  
Presenter: PI/Program Coordinator

9:00am-10:00am

**Responsible Conduct of Research: Concerns Specific to D&I research**  
Presenter: Core Faculty

10:00am-10:15am

Break

10:15am- 11:00am

**Final Meeting with your Mentor**  
1<sup>st</sup> & 2<sup>nd</sup> Years together

11:00am-12:00pm

**Final Wrap Up Discussion/Next Steps**  
Presenter: PI and Program Coordinator

Note: Topics change each year depending on what was covered in year's past and the cohort of Fellows. Guest Faculty change each year and are invited based on topics to be covered. This agenda is meant to highlight the basic format of the training institute as well as a sample of topics that were covered in one institute.
