# Supplementary material for: Training scholars in dissemination and implementation research for cancer prevention and control: a mentored approach
Source: Springer Nature journal article supplement (doi:10.1186/s13012-018-0711-3), 2018-01-22
Supplement: MOESM2 [file 15406556]

**MT-DIRC D&I Skills 2014 & 2015 Full Data**

**N=26**

| Skill level                                            | Competency                                                                                                      | Pre Mean (Std) | 6 Mo. Mean (Std) | 18 Mo. Mean (Std) | Pre vs. 6 Mo. MD | 6 Mo. vs 18 Mo. MD | Pre vs 18 Mo. MD  | Cohen's <i>d</i> Pre to 18 Mo. | Maulchy 's* p<.05 | Within-Subjects Effect**                   |
|--------------------------------------------------------|-----------------------------------------------------------------------------------------------------------------|----------------|------------------|-------------------|------------------|--------------------|-------------------|--------------------------------|-------------------|--------------------------------------------|
| <b>Domain A: Definitions, Background and Rationale</b> |                                                                                                                 |                |                  |                   |                  |                    |                   |                                |                   |                                            |
| B                                                      | Define and communicate D&I research terminology                                                                 | 2.85<br>±0.784 | 3.92<br>±0.628   | 4.23<br>±0.587    | -1.077<br>p=.000 | -0.308<br>p=.053   | -1.077<br>p=.000  | 1.992                          | p=.038<br>ξ=.808  | df (1.616,40.389),<br>F=45.2<br>p= 0.000   |
| B                                                      | Define what is and what is not D&I research                                                                     | 2.96<br>±0.824 | 3.92<br>±0.720   | 4.23<br>±0.587    | -1.00<br>p=.000  | -.269<br>p=.329    | -1.269<br>p=.000  | 1.775                          | p=.302            | df (2,50) , F= 28.028<br>p= 0.000          |
| B                                                      | Differentiate between D&I research and other related areas such as efficacy research and effectiveness research | 3.42<br>±0.857 | 3.96<br>±0.662   | 4.38<br>±0.571    | -.538<br>p=.007  | -.423<br>p=.003    | -.962<br>p=.000   | 1.318                          | p=.160            | df (2,50), F=22.776<br>p= 0.000            |
| B                                                      | Identify the potential impact of disseminating, implementing and sustaining effective interventions             | 3.12<br>±0.909 | 4.00<br>±0.632   | 4.31<br>±0.679    | -.885<br>p=.000  | -.308<br>p=.053    | -1.192<br>p=.000  | 1.483                          | p=.003<br>ξ=.718  | df(1.437, 35.915),<br>F=24.011<br>p= 0.000 |
| B                                                      | Describe the range of expertise needed to conduct D&I research                                                  | 2.88<br>±0.993 | 3.85<br>±0.925   | 4.31<br>±.736     | -.962<br>p=.000  | -.462<br>p=.034    | -.1142<br>p=.000  | 1.636                          | p=.144            | df(2, 50), F = 13.126<br>p= .000           |
| I                                                      | Determine which evidence-based interventions are worth disseminating and implementing                           | 3.23<br>±0.815 | 3.73<br>±0.778   | 4.08<br>±0.688    | -.500<br>p=.020  | -.346<br>p=.108    | -.846<br>p=.000   | 1.137                          | p=.847            | df(2, 50) = 13.126<br>p= 0.000             |
| I                                                      | Assess, describe and qualify the context for effective D&I                                                      | 2.62<br>±0.941 | 3.46<br>±0.761   | 4.08<br>±0.744    | -.846<br>p=.001  | -.615<br>p=.020    | -1.462<br>p=.000  | 1.721                          | p=.951            | df(2,50), F = 24.419,<br>p= 0.000          |
| I                                                      | Identify existing gaps in D&I research                                                                          | 2.50<br>±0.906 | 3.50<br>±0.707   | 3.65<br>±0.797    | -1.00<br>p=.000  | -.154<br>p=1.00    | -1.154<br>P=.000  | 1.347                          | p=.683            | df(2,50), F = 27.949,<br>p= 0.000          |
| I                                                      | Identify the potential impact of scaling down an ineffective but often used intervention                        | 2.08<br>±0.935 | 3.19<br>±0.849   | 3.58<br>±0.902    | -1.115<br>p=.000 | -.385<br>p= 0.171  | -1.500<br>p=.000  | 1.632                          | p=.380            | df(2,50), F = 25.927<br>p= 0.000           |
| I                                                      | Formulate methods to address barriers of D&I research                                                           | 2.38<br>±0.898 | 3.31<br>±0.788   | 3.42<br>±0.758    | -.923<br>p=.001  | -.115<br>p=1.000   | -1.038<br>p=.000  | 1.251                          | p=.197            | df(2,50) F= 16.311,<br>p= 0.000            |
| <b>Domain B: Theory and Approaches</b>                 |                                                                                                                 |                |                  |                   |                  |                    |                   |                                |                   |                                            |
| B                                                      | Describe a range of D&I strategies, models, and framework                                                       | 2.62<br>±0.804 | 3.69<br>±0.838   | 4.08<br>±0.796    | -1.077<br>p=.000 | -.385<br>p=.046    | -1.462<br>p=.000  | 1.824                          | p=.861            | df(2,50), F = 50.346,<br>p= 0.000          |
| I                                                      | Identify appropriate conceptual models, frameworks or program logic for D&I change                              | 2.62<br>±0.941 | 3.54<br>±0.859   | 4.08<br>±0.744    | -.923<br>p=.000  | -.538<br>p=.004    | -1.462<br>p=.000  | 1.721                          | p=.107            | df(2,50) F= 47.595<br>p= 0.000             |
| I                                                      | Identify core elements of effective interventions and recognize risks of making modifications                   | 2.69<br>±0.736 | 3.35<br>±0.797   | 3.54<br>±0.582    | -.654<br>p=.002  | -.192<br>p=.608    | -.846<br>p=.000   | 1.281                          | p=.655            | df(2,50) F= 14.955<br>p= 0.000             |
| I                                                      | Describe a process for designing for dissemination                                                              | 2.77<br>±0.908 | 3.46<br>±0.859   | 3.81<br>±0.749    | -.692<br>p=.002  | -.346<br>p=.029    | -1.038<br>p=.000  | 1.249                          | p=.096            | df(2,50), F= 21.641<br>p= 0.000            |
| I                                                      | Describe the relationships between various organizational dimensions and D&I research                           | 2.46<br>±0.989 | 3.27<br>±0.724   | 3.65<br>±0.745    | -.808<br>p=.000  | -.385<br>p=.066    | -1.192<br>p=.000  | 1.359                          | p=.554            | df(2,50), F = 26.631<br>p= 0.000           |
| I                                                      | Explain how knowledge from disciplines outside of                                                               | 2.50<br>±.949  | 3.38<br>±0.804   | 3.62<br>±.804     | -.885<br>p=.000  | -.231<br>p=.093    | -1.115<br>p= .000 | 1.273                          | P=.018<br>ξ=.779  | df(1.557, 38.937),<br>F=32.248             |

**MT-DIRC D&I Skills 2014 & 2015 Full Data**

**N=26**

|                                        |                                                                                                               |                |                |                |                  |                   |                    |       |        |                                  |
|----------------------------------------|---------------------------------------------------------------------------------------------------------------|----------------|----------------|----------------|------------------|-------------------|--------------------|-------|--------|----------------------------------|
|                                        | health can help inform further trans disciplinary efforts in D&I                                              |                |                |                |                  |                   |                    |       |        | p= 0.000                         |
| I                                      | Identify and articulate the interplay between policy and organizational process in D&I                        | 2.31<br>±1.08  | 3.31<br>±0.884 | 3.69<br>±0.838 | -1.00<br>P=.000  | -.385<br>P=.066   | -1.385<br>P=.000   | 1.427 | p=.191 | df(2,50), F= 31.975,<br>p= 0.000 |
| <b>Domain C: Design &amp; Analysis</b> |                                                                                                               |                |                |                |                  |                   |                    |       |        |                                  |
| B                                      | Describe the core components of their external validity and their relevance to D&I research                   | 2.81<br>±0.939 | 3.50<br>±0.860 | 4.08<br>±0.796 | -.692<br>p=.010  | -.577<br>p= .002  | -1.269<br>p= 0.000 | 1.459 | p=.132 | df(2,50), F= 23.507,<br>p= 0.000 |
| B                                      | Identify common D&I measures & analytic strategies for your research questions                                | 2.35<br>±0.892 | 3.46<br>±0.811 | 4.04<br>±0.662 | -1.115<br>p=.000 | -.577<br>p= .000  | -1.692<br>p= .000  | 2.151 | p=.148 | df(2,50), F = 62.025<br>p= 0.000 |
| I                                      | Identify and measure outcomes that matter to stakeholders, adopters, and implementers                         | 2.92<br>±0.891 | 3.62<br>±0.804 | 4.00<br>±0.748 | -.692<br>p=.000  | -.385<br>p=.046   | -1.077<br>p=.000   | 1.312 | p=.897 | df(2,50), F = 26.678<br>p=0.000  |
| I                                      | Describe the application and integration of mixed-methods approaches in D&I research                          | 3.23<br>±0.908 | 3.85<br>±0.925 | 4.15<br>±0.834 | -.615<br>p=.005  | -.308<br>p=.218   | -.923<br>p=.000    | 1.055 | p=.787 | df(2,50), F= 16.092<br>p= 0.000  |
| I                                      | Apply common D&I measures & analytic strategies for your research questions within your model/framework       | 2.50<br>±0.812 | 3.46<br>±0.761 | 3.85<br>±0.732 | -.962<br>p=.000  | -.385<br>p=.028   | -1.346<br>p=.000   | 1.746 | p=.743 | df(2,50), F= 43.605<br>p= 0.000  |
| I                                      | Identify possible methods to address external validity in study design reporting and implementation           | 2.27<br>±0.778 | 3.15<br>±0.732 | 3.69<br>±0.618 | -.885<br>p=.000  | -.538<br>p=.004   | -1.423<br>p=.000   | 2.021 | p=.740 | df(2,50), F = 39.126<br>p= 0.000 |
| I                                      | List the potential roles of mediators and moderators in a D&I study                                           | 2.46<br>±0.905 | 3.31<br>±0.788 | 3.73<br>±0.724 | -.846<br>p=.000  | -4.23<br>p=.040   | -1.269<br>p=.000   | 1.549 | p=.737 | df(2,50), F= 29.698<br>p= 0.000  |
| I                                      | Identify and articulate the trade-offs between a variety of different study designs for D&I research          | 2.19<br>±0.895 | 3.35<br>±0.846 | 3.69<br>±0.788 | -1.154<br>P=.000 | -.346<br>P=.108   | -1.500<br>P=.000   | 1.778 | p=.353 | df(2,50), F=37.726<br>p= 0.000   |
| I                                      | Describe how to frame and analyze the context of D&I as a complex system with interacting parts               | 2.31<br>±0.970 | 3.04<br>±0.774 | 3.62<br>±0.852 | -.731<br>p=.013  | -.577<br>p=.014   | -1.308<br>p=.000   | 1.434 | p=.242 | df(2,50), F= 21.203<br>p=0.000   |
| I                                      | Effectively integrate the concepts of sustainability/sustainment and rational behind them in D&I study design | 2.38<br>±1.061 | 3.23<br>±0.765 | 3.69<br>±0.838 | -.846<br>p=001   | -4.62<br>p=.023   | -1.308<br>p= .000  | 1.370 | p=.142 | df(2,50), F= 22.167<br>p=0.000   |
| I                                      | Describe gaps in D&I measurement and critically evaluate how to fill them                                     | 2.27<br>±0.962 | 3.15<br>±0.834 | 3.35<br>±0.689 | -.885<br>p=.000  | -.192<br>p=.778   | -1.077<br>p=.000   | 1.290 | p=.078 | df(2,50), F= 19.335<br>p= 0.000  |
| A                                      | Effectively explain and incorporate concepts of de-adoption and de-implementation into D&I study designs      | 1.80<br>±0.866 | 3.08<br>±0.812 | 3.20<br>±0.913 | -1.280<br>p=.000 | -.120<br>p= 1.000 | -1.400<br>p=.000   | 1.573 | p=.221 | df(2,50), F= 25.300<br>p= 0.000  |

**MT-DIRC D&I Skills 2014 & 2015 Full Data**

**N=26**

|                                                |                                                                                                                      |                |                |                |                  |                    |                   |       |                  |                                           |
|------------------------------------------------|----------------------------------------------------------------------------------------------------------------------|----------------|----------------|----------------|------------------|--------------------|-------------------|-------|------------------|-------------------------------------------|
| A                                              | Incorporate methods of economic evaluation in D&I study design                                                       | 1.81<br>±0.749 | 2.77<br>±0.815 | 2.85<br>±1.120 | -0.962<br>p=.000 | -0.077<br>p= 1.000 | -1.038<br>p= .000 | 1.091 | p=.424           | df(2,50), F= 21.847<br>p=0.000            |
| A                                              | Evaluate and refine innovative scale up and spread methods                                                           | 2.00<br>±0.938 | 2.92<br>±0.628 | 3.19<br>±1.021 | -0.923<br>p=.000 | -0.269<br>p= .387  | -1.192<br>p=.000  | 1.213 | p=.011<br>é=.761 | df(1,522, 38.042),<br>F=19.805<br>p=0.000 |
| <b>Domain D: Practice Based Considerations</b> |                                                                                                                      |                |                |                |                  |                    |                   |       |                  |                                           |
| B                                              | Describe the importance of incorporating the perspective of different stakeholder groups                             | 3.54<br>±0.905 | 4.15<br>±0.834 | 4.42<br>±0.703 | -0.615<br>p=.005 | -0.269<br>p=.269   | -0.885<br>p=.000  | 1.085 | p=.577           | df(2,50), F= 16.063<br>p= 0.000           |
| B                                              | Describe the concept of measurement and fidelity                                                                     | 3.27<br>±0.919 | 3.81<br>±0.849 | 4.27<br>±0.724 | -0.538<br>p=.040 | -0.462<br>p=.046   | -1.000<br>p=.000  | 1.208 | p=.737           | df(2,50), F= 13.397<br>p=0.000            |
| B                                              | Articulate the strengths and weaknesses of participatory research in D&I research                                    | 2.92<br>±0.891 | 3.96<br>±0.916 | 4.19<br>±0.895 | -1.038<br>p=.000 | -0.231<br>p=.621   | -1.269<br>p=.000  | 1.422 | p=.951           | df(2,50), F= 29.373<br>p= 0.000           |
| I                                              | Determine when engagement in participatory research in appropriate with D&I research                                 | 2.62<br>±0.898 | 3.81<br>±0.849 | 4.04<br>±0.824 | -1.192<br>p=.000 | -0.231<br>p= .555  | -1.423<br>p= .000 | 1.647 | p=.798           | df(2,50), F= 41.364<br>p= 0.000           |
| I                                              | Describe the appropriate process for eliciting input from community-based practitioners for adapting an intervention | 2.81<br>±1.021 | 3.77<br>±0.951 | 4.12<br>±0.909 | -0.962<br>p=.000 | -0.346<br>p=.321   | -1.308<br>p=.000  | 1.355 | p=.593           | df(2,50), F= 25.437<br>p= 0.000           |
| I                                              | Identify and apply techniques for stakeholder analysis and engagement when implementing evidence-based practices     | 2.38<br>±0.941 | 3.38<br>±0.804 | 3.77<br>±0.908 | -1.00<br>p=.000  | -0.385<br>p=.116   | -1.385<br>p=.000  | 1.503 | p=.762           | df(2,50), F= 28.337<br>p= 0.000           |
| I                                              | Identify a process for adapting an intervention and how the process is relevant to D&I research                      | 2.69<br>±0.884 | 3.38<br>±0.752 | 3.92<br>±0.796 | -0.692<br>p=.002 | -0.538<br>p= .007  | -1.231<br>p= .000 | 1.462 | p=.505           | df(2,50), F= 24.492<br>p=0.000            |
| I                                              | Explain how to maintain fidelity of original intervention during the adaption process                                | 2.58<br>±0.902 | 3.19<br>±0.895 | 3.73<br>±0.724 | -0.615<br>p=.005 | -0.538<br>p= .023  | -1.154<br>p=.000  | 1.406 | p=.912           | df(2,50), F= 19.697<br>p= 0.000           |
| I                                              | Identify sites to participate in D&I studied and negotiate or proved incentives to secure their involvement          | 2.77<br>±1.070 | 3.46<br>±0.859 | 3.69<br>±1.011 | -0.692<br>p=.005 | -0.231<br>p=.621   | -0.923<br>p=.000  | 0.883 | p=.695           | df(2,50), F=12.162<br>p= 0.000            |
| I                                              | Identify and develop sustainable partnerships for D&I research                                                       | 2.73<br>±1.002 | 3.65<br>±0.892 | 3.73<br>±0.874 | -0.923<br>p=.000 | -0.077<br>p= 1.000 | -1.00<br>p=.000   | 1.063 | p=.375           | df(2,50), F= 20.933<br>p= 0.000           |
| I                                              | Describe how to measure successful partnerships for D&I research                                                     | 2.12<br>±0.952 | 3.31<br>±0.788 | 3.31<br>±0.970 | -1.192<br>p=.000 | .000<br>p=1.000    | -1.192<br>p=.000  | 1.134 | p=.256           | df(2,50), F= 27.147<br>p=0.000            |
| A                                              | Use evidence and adapt D&I strategies for specific populations, settings, contexts, resources and/or capacities      | 2.54<br>±0.989 | 3.38<br>±0.804 | 3.77<br>±0.908 | -0.846<br>p=.000 | -0.385<br>p=.090   | -1.231<br>p=.000  | 1.295 | p=.210           | df(2,50), F= 22.686<br>p= 0.000           |

\*Greenhouse Geiser Lower-bound= 0.5; Statistic is included if Mauchly's Test of Sphericity is significant

\*\* correct F Stat is utilized based on Assumption of Sphericity

Skill Level: (B)= Beginner Skill, (I)= Intermediate Skill, (A)= Advanced Skill
